# Supplementary material for: Evaluation of the capacities of mouse TCR profiling from short read RNA-seq data
Source: PubMed Central journal article supplement (PMC6237323; doi:10.1371/journal.pone.0207020), 2018-11-15
Supplement: pone.0207020.s001.pdf [file pone.0207020.s001.pdf]

**Table A**

| Tissue source | Sample type | Locus                       | sequencing protocol | sequencing depth(Million) | rate of total reads mapped | rate of reads mapped to TCR loci <sup>a</sup> | rate of reads used for CDR3 call <sup>b</sup> |
|---------------|-------------|-----------------------------|---------------------|---------------------------|----------------------------|-----------------------------------------------|-----------------------------------------------|
| MC38 tumor    | single cell | TCR $\alpha$<br>TCR $\beta$ | 1x75bp              | 2.2 per cell              | 0.66                       | 1.6E-03<br>1.8E-03                            | 1E-05<br>2.0E-05                              |
|               | cell pool   | TCR $\alpha$<br>TCR $\beta$ | 1x80bp              | 159.1                     | 0.93                       | 1.1E-03<br>3.1E-03                            | 2.6E-05<br>5.1E-05                            |
| Spleen        | single cell | TCR $\alpha$<br>TCR $\beta$ | 1x75bp              | 2.6 per cell              | 0.64                       | 1.4E-03<br>2.3E-03                            | 1E-05<br>2.6E-05                              |
|               | cell pool   | TCR $\alpha$<br>TCR $\beta$ | 1x80bp              | 128.6                     | 0.87                       | 1.0E-03<br>3.4E-03                            | 2.0E-05<br>5.2E-05                            |

<sup>a</sup> The percentage is calculated as the mean ratio of the number of reads mapped to all the TCRV/J/D/C segments versus the total number of mapped reads

<sup>b</sup>The percentage is calculated as the mean ratio of the number of the high quality CDR3 containing reads to the total number of mapped reads over all available samples.

**Table B**

| Symbol               | fold change <sup>a</sup> | Symbol          | fold change | Symbol         | fold change |
|----------------------|--------------------------|-----------------|-------------|----------------|-------------|
| <i>2010111101Rik</i> | 34.6                     | <i>Vamp8</i>    | 3.9         | <i>Igf2r</i>   | 2.8         |
| <i>Klre1</i>         | 33.2                     | <i>Fkbp1a</i>   | 3.9         | <i>Sept11</i>  | 2.8         |
| <i>Satb1</i>         | -30.9                    | <i>Prdx5</i>    | 3.8         | <i>Gapdh</i>   | 2.7         |
| <i>Ifng</i>          | 17.7                     | <i>Klrc1</i>    | 3.7         | <i>Dut</i>     | 2.6         |
| <i>Pced1b</i>        | -11.8                    | <i>Pdcd4</i>    | -3.6        | <i>Cox7c</i>   | 2.6         |
| <i>Itgav</i>         | 11.4                     | <i>Prf1</i>     | 3.6         | <i>Id2</i>     | 2.6         |
| <i>Serpina3g</i>     | 10.7                     | <i>Stat3</i>    | 3.5         | <i>Pkm</i>     | 2.5         |
| <i>Bnip3</i>         | 10.6                     | <i>Ybx3</i>     | 3.4         | <i>Sat1</i>    | 2.4         |
| <i>Tnfrsf9</i>       | 8.3                      | <i>Arl14ep</i>  | 3.3         | <i>Gzmb</i>    | 2.4         |
| <i>Il2ra</i>         | 8.3                      | <i>Cisd3</i>    | 3.2         | <i>Ost4</i>    | 2.4         |
| <i>Serpinb6b</i>     | 7.7                      | <i>Eno1</i>     | 3.2         | <i>Gm12070</i> | 2.4         |
| <i>Rgs16</i>         | 7.0                      | <i>Cd44</i>     | 3.2         | <i>Hprt</i>    | 2.3         |
| <i>Vim</i>           | 7.0                      | <i>Tpi1</i>     | 3.2         | <i>Rps27rt</i> | -2.3        |
| <i>Pgk1</i>          | 6.7                      | <i>Gm5643</i>   | 3.2         | <i>Eno1b</i>   | 2.2         |
| <i>Litaf</i>         | 6.5                      | <i>Hist1h1e</i> | 3.1         | <i>Ctla4</i>   | 2.2         |
| <i>Lag3</i>          | 6.0                      | <i>Prickle3</i> | 3.1         | <i>Tigit</i>   | 2.2         |
| <i>Bcl2a1d</i>       | 5.4                      | <i>Irf8</i>     | 3.1         | <i>Spes3</i>   | 2.1         |
| <i>Bcl2a1a</i>       | 5.3                      | <i>Foxp1</i>    | -3.1        | <i>Gm6682</i>  | 2.1         |
| <i>Kpna4</i>         | 5.0                      | <i>Plp2</i>     | 3.0         | <i>Higd1a</i>  | 2.1         |
| <i>Hilpda</i>        | 4.7                      | <i>Reep5</i>    | 3.0         | <i>Akr1a1</i>  | 2.1         |
| <i>Tnfrsf4</i>       | 4.3                      | <i>Aldoa</i>    | 2.9         | <i>Fxyd5</i>   | 2.0         |
| <i>Plek</i>          | 4.1                      | <i>Pgam1</i>    | 2.9         |                |             |
| <i>Cox17</i>         | 4.1                      | <i>Rps27</i>    | -2.8        |                |             |

<sup>a</sup> Average fold change over the comparisons of the 13- and 12-cell clones to the singletons in the MC28 tumor and the spleen.

**Table C**

| Tissue source | Sample type | Locus                       | sequencing protocol | sequencing depth (Million) | rate of reads mapped | rate of reads mapped to TCR <sup>a</sup> | rate of reads used for CDR3 derivation <sup>b</sup> |
|---------------|-------------|-----------------------------|---------------------|----------------------------|----------------------|------------------------------------------|-----------------------------------------------------|
| LCMV infected | bulk        | TCR $\alpha$<br>TCR $\beta$ | 2x100bp             | 148.5                      | 0.912                | 1.0E-03<br>3.8E-03                       | 4E-05<br>8.6E-05                                    |
|               | targeted    | TCR $\alpha$<br>TCR $\beta$ | 2x301bp             | 0.32<br>0.45               | 0.91<br>0.97         |                                          | 0.60<br>0.89                                        |
| naïve         | bulk        | TCR $\alpha$<br>TCR $\beta$ | 2x100bp             | 108.7                      | 0.905                | 1.5E-03<br>6.3E-03                       | 3.2E-05<br>6.6E-05                                  |
|               | targeted    | TCR $\alpha$<br>TCR $\beta$ | 2x301bp             | 0.41<br>0.47               | 0.71<br>0.96         |                                          | 0.49<br>0.68                                        |

<sup>a</sup> The percentage is calculated as the mean ratio of the number of reads mapped to all the TCRV/J/D/C segments versus the total number of mapped reads

<sup>b</sup> The percentage is calculated as the mean ratio of the number of the high quality CDR3 containing reads to the total number of mapped reads over all available samples.

**Table D**

| Tissue source   | measurement           | bulk RNA-Seq only | overlap | targeted Seq only |
|-----------------|-----------------------|-------------------|---------|-------------------|
| Naïve           | #unique TCR $\alpha$  | 1307              | 182     | 18101             |
|                 | %reads (bulk RNA-Seq) | 85.0%             | 15.0%   | –                 |
|                 | %reads (targeted seq) | –                 | 3.2%    | 96.8%             |
| LCMV challenged | #unique TCR $\alpha$  | 554               | 750     | 11162             |
|                 | %reads (bulk RNA-Seq) | 22.2%             | 77.8%   | –                 |
|                 | %reads (targeted seq) | –                 | 54.0%   | 46.0%             |



**Fig B**

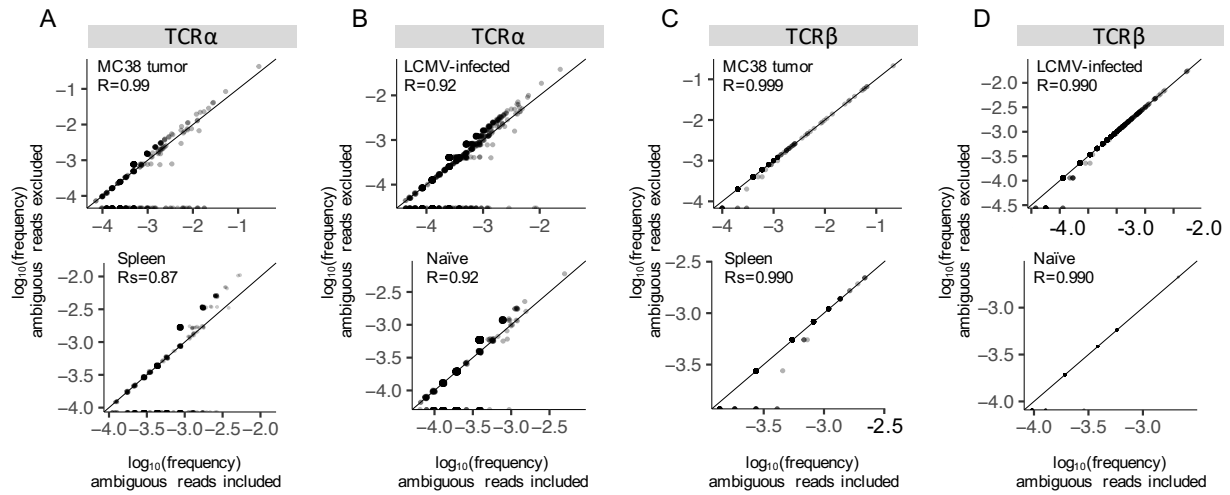

**Fig C**

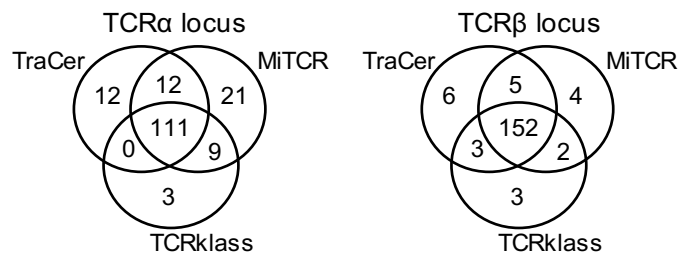

**Fig D**

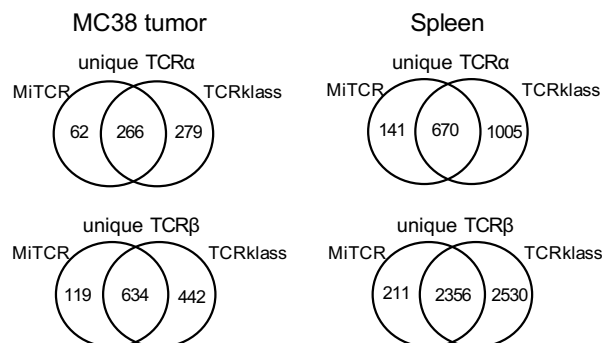

Fig E

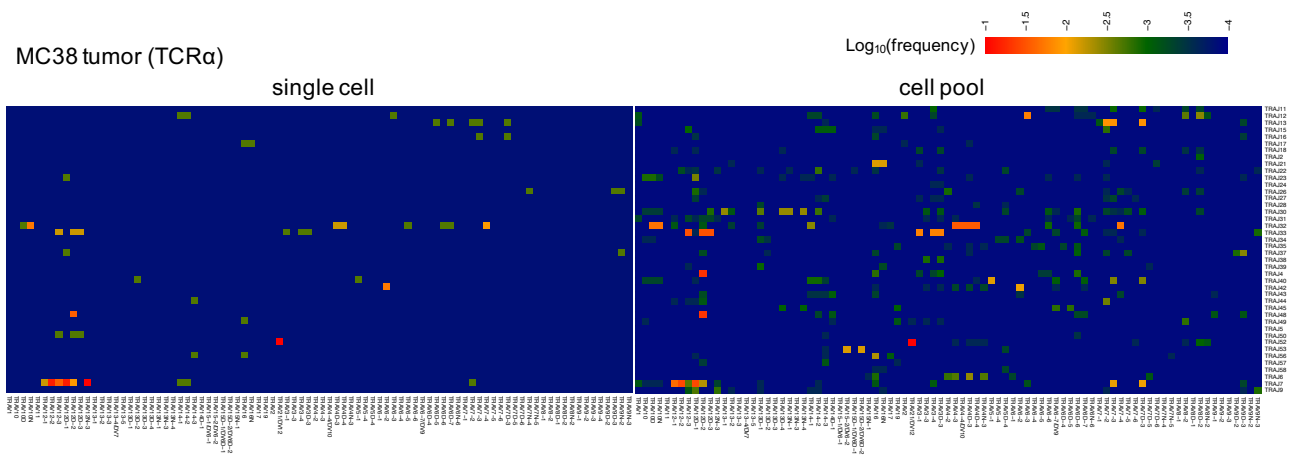

Fig F

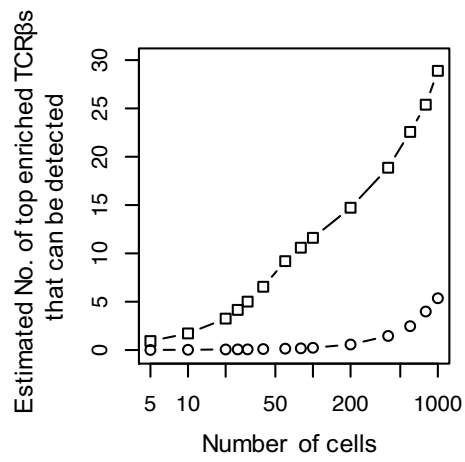

**Fig G**

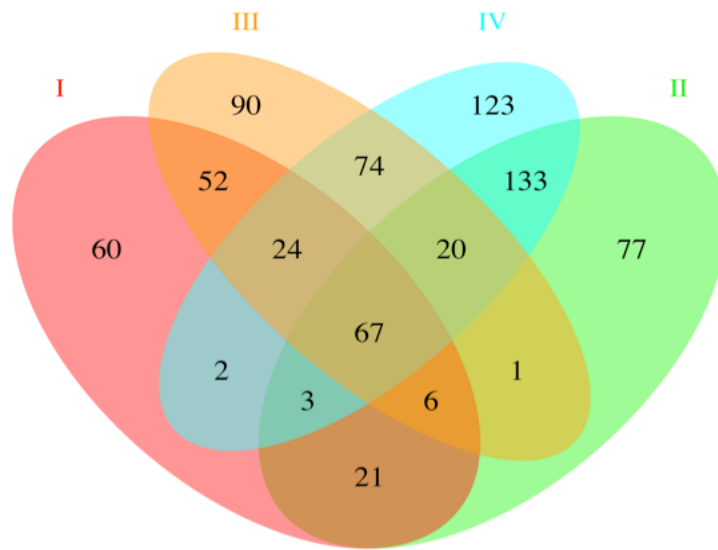

**I:** 13-cell clone vs. all singleton clones in MC38 tumor  
**II:** 12-cell clone vs. all singleton clones in MC38 tumor  
**III:** 13-cell clone in MC38 tumor vs. all clones in spleen  
**IV:** 12-cell clone in MC38 tumor vs. all clones in spleen

**Fig H**

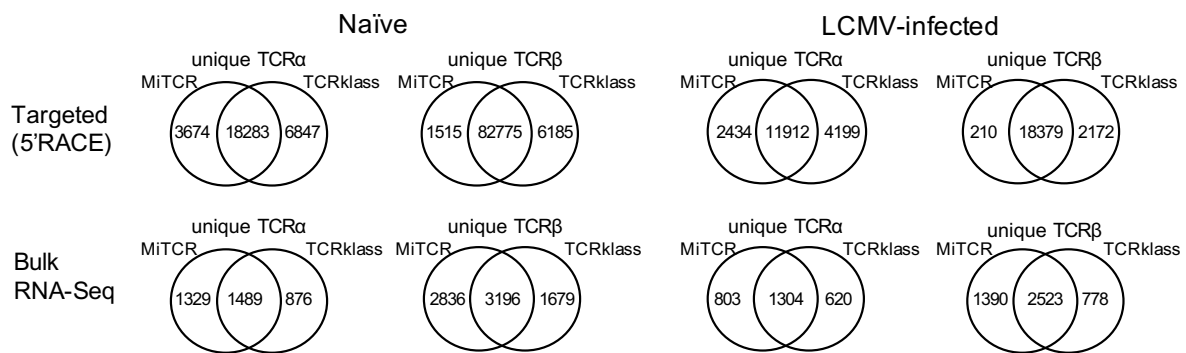

**Fig I**

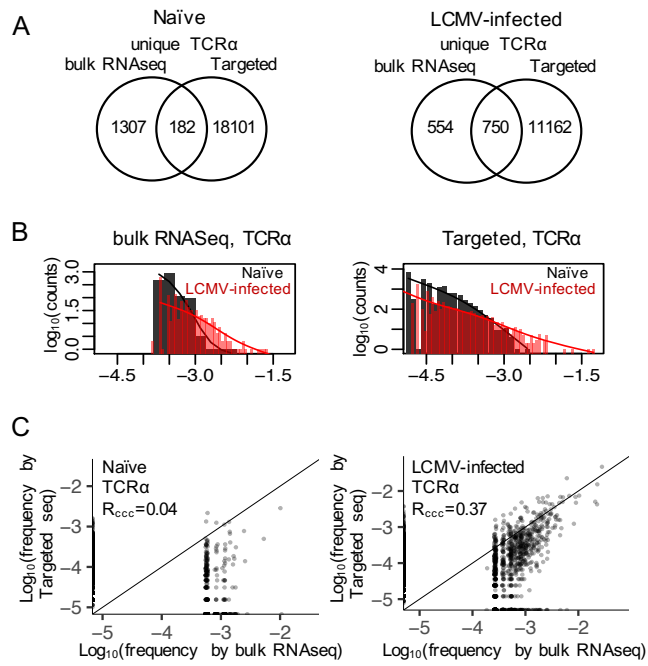

**Fig J**

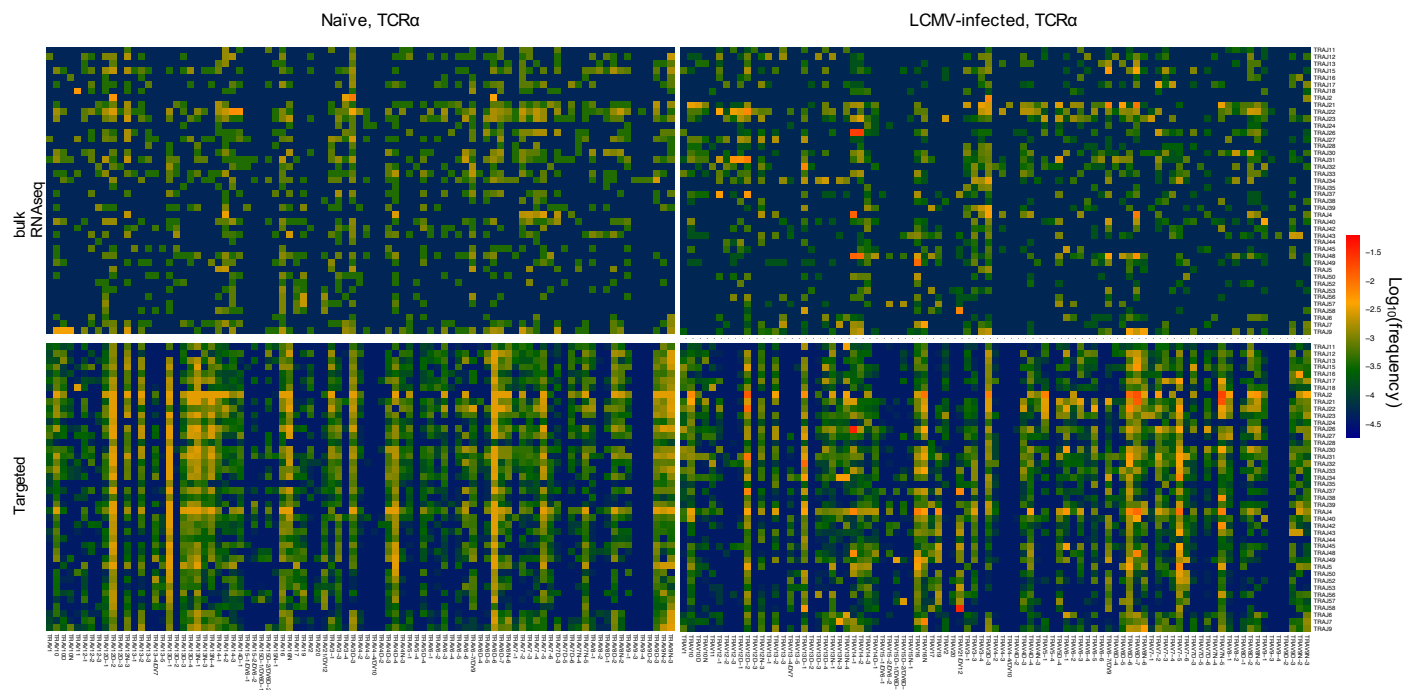

### **Parameters used in published programs for RNA-Seq based TCR profiling**

When TraCer was applied to the single cell data, all parameters were set at default. When running MiTCR we adopted the parameters tailored for RNA-Seq in a previous study [1]. More specifically, the parameters for the single cell data (read length = 75bp) are: minAlignmentMatches = 18, 11, 12 and 18 for TRAV, TRAJ, TRBV and TRBJ, respectively and qualityInterpretationStrategy = 25. In case of the bulk RNA-Seq (read length = 100bp), the parameters are: minAlignmentMatches = 12, 19, 14 and 16 for TRAV, TRAJ, TRBV and TRBJ, respectively and qualityInterpretationStrategy = 35.

In order to use TCRklass on transcriptome data, we first mapped the reads to the mouse transcriptome (GRCm38/mm10) using TopHat2 (version 2.0.12). The reads aligned to any of the V, D, J, C regions of the TCR $\alpha$  (or the TCR $\beta$ ) locus were saved for future usage. The remaining reads were mapped by Bowtie2 (version 2.2.3) against the collection of all the V and J allelic sequences in mouse (IMGT GENE-DB, v3.1.18), wherein both a global (--end-to-end, --very-sensitive) and a local alignment (--very-sensitive-local) were executed and the mapped reads were collected. In the end, all above collected reads were analyzed by TCRklass (0.6.0). The parameters used can be found in S6 Supplementary File.

### **Impact of cell numbers on the TCR detection power in single cell RNA-Seq**

We estimated the sampling power of single cells in terms of how many clones in a repertoire may be detected given the number of cells. For this exercise, we focused on TCR $\beta$  for its higher coverage and typing consistency. We approximated the distribution of TCRs in the mouse MC38 tumor and spleen using the RNA-Seq data of the aliquots from their respective cell pools. The frequency of a TCR $\beta$  was calculated as the percentage of the reads mapped to it among all detected TCR $\beta$ s (S3 Supplementary Data). The TCR $\beta$ s were sorted in descending frequency. For instance, the 30<sup>th</sup> enriched TCR $\beta$  in this dataset corresponds to a frequency of ~0.2%. We then sampled the TCR $\beta$ s in the MC38 tumor (or spleen) cell pool with probabilities proportional to their frequencies. For a given cell number  $N$ , we performed the sampling  $N$  times, and examined how many top frequent TCR $\beta$ s (from top 1 counting downwards) were detected at least once. This value serves as an estimation of the detection power of  $N$  single cells. Fig F summarizes the detection power of 5-1000 cells, each averaged over 10 repeated samplings. Note that the TCR distribution in the cell pools was measured based on the transcript abundance, which may not reflect the actual clonal abundance in the repertoire. The results here may be considered at most an order-of-magnitude estimation.

1. Brown SD, Raeburn LA, Holt RA. Profiling tissue-resident T cell repertoires by RNA sequencing. *Genome Med.* 2015;7:125.
