# Supplementary material for: Evaluation of the capacities of mouse TCR profiling from short read RNA-seq data
Source: PLoS One. 2018 Nov 15;13(11):e0207020. doi: 10.1371/journal.pone.0207020 (PMC6237323; doi:10.1371/journal.pone.0207020)
Supplement: S1 Supplementary Data — (XLSX) [file pone.0207020.s002.xlsx]

## Sheet: Sheet1
TCR calls in T cells from MC38 tumor															TCR calls in T cells from spleen
cell_id	locus	consensus.tcr	consensus.cdr3.aa	consensus.v	consensus.j	expression level(TPM)		locus	consensus.tcr	consensus.cdr3.aa	consensus.v.1	consensus.j	expression level(TPM)		cell_id	locus	consensus.tcr	consensus.cdr3.aa	consensus.v	consensus.j	expression level(TPM)		locus	consensus.tcr	consensus.cdr3.aa	consensus.v.1	consensus.j	expression level(TPM)
793688	A	TRAV12N-3,TRAV12-2,TRAV12D-1:CALRGDYSNNRLTL:TRAJ7	CALRGDYSNNRLTL	TRAV12N-3,TRAV12-2,TRAV12D-1	TRAJ7	392.807		B	TRBV13-1:CASSDALGVNQDTQYF:TRBJ2-5	CASSDALGVNQDTQYF	TRBV13-1	TRBJ2-5	654.453		793819	A	TRAV8D-2,TRAV8N-2:CATDVLNNNAGAKLTF:TRAJ39	CATDVLNNNAGAKLTF	TRAV8D-2,TRAV8N-2	TRAJ39	629.534		B	TRBV4:CASGAETLYF:TRBJ2-3	CASGAETLYF	TRBV4	TRBJ2-3	980.122
															793819								B	TRBV20:CGARDARGGNERLFF:TRBJ1-4	CGARDARGGNERLFF	TRBV20	TRBJ1-4	442.517
793689	A	⎯	⎯	⎯	⎯			B	TRBV3:CASSLGGDEVFF:TRBJ1-1	CASSLGGDEVFF	TRBV3	TRBJ1-1	1301.74		793821	A	⎯	⎯	⎯	⎯			B	TRBV13-3:CASSDNRYEQYF:TRBJ2-7	CASSDNRYEQYF	TRBV13-3	TRBJ2-7	1279.68
793691	A	⎯	⎯	⎯	⎯			B	TRBV16:CASSSRGRFEQYF:TRBJ2-7	CASSSRGRFEQYF	TRBV16	TRBJ2-7	1919.65		793824	A	TRAV7-6:CAGARQGGSAKLIF:TRAJ57	CAGARQGGSAKLIF	TRAV7-6	TRAJ57			B	TRBV29:CASSLGDGEQYF:TRBJ2-7	CASSLGDGEQYF	TRBV29	TRBJ2-7
793699	A	TRAV6D-7,TRAV6D-5:CALGETGTYQRF:TRAJ13	CALGETGTYQRF	TRAV6D-7,TRAV6D-5	TRAJ13	1039.71		B	⎯	⎯	⎯	⎯			793825	A	TRAV12D-2:CASLTGSGGKLTL:TRAJ44	CASLTGSGGKLTL	TRAV12D-2	TRAJ44	1131.54		B	TRBV19:CASSMEYEQYF:TRBJ2-7	CASSMEYEQYF	TRBV19	TRBJ2-7	318.22
793700	A	TRAV3D-3,TRAV3-1,TRAV3-4:CAVSADSNYQLIW:TRAJ33	CAVSADSNYQLIW	TRAV3D-3,TRAV3-1,TRAV3-4	TRAJ33	1324.9		B	TRBV13-1:CASSETGGDYAEQFF:TRBJ2-1	CASSETGGDYAEQFF	TRBV13-1	TRBJ2-1	2042.24		793828	A	TRAV14-3:CAASEDTGYQNFYF:TRAJ49	CAASEDTGYQNFYF	TRAV14-3	TRAJ49	79.0217		B	TRBV4:CASSYRDNYAEQFF:TRBJ2-1	CASSYRDNYAEQFF	TRBV4	TRBJ2-1	1530.37
															793828								B	TRBV13-1:CASSDAGGLNERLFF:TRBJ1-4	CASSDAGGLNERLFF	TRBV13-1	TRBJ1-4	407.834
793702	A	TRAV21/DV12:CILRVESGANTGKLTF:TRAJ52	CILRVESGANTGKLTF	TRAV21/DV12	TRAJ52	858.201		B	TRBV15:CASSLGQGYEQYF:TRBJ2-7	CASSLGQGYEQYF	TRBV15	TRBJ2-7	88.3198		793831	A	⎯	⎯	⎯	⎯			B	TRBV1:CTCSAGTTNYEQYF:TRBJ2-7	CTCSAGTTNYEQYF	TRBV1	TRBJ2-7	1100.92
793703	A	TRAV7-4:CAASEDYGSSGNKLIF:TRAJ32	CAASEDYGSSGNKLIF	TRAV7-4	TRAJ32	675.409		B	⎯	⎯	⎯	⎯			793835	A	TRAV12D-2:CALSGTYQRF:TRAJ13	CALSGTYQRF	TRAV12D-2	TRAJ13	303.404		B	⎯	⎯	⎯	⎯
793704	A	TRAV6-2:CVLGDGGSNAKLTF:TRAJ42	CVLGDGGSNAKLTF	TRAV6-2	TRAJ42	758.709		B	TRBV2:CASSQGGGISNERLFF:TRBJ1-4	CASSQGGGISNERLFF	TRBV2	TRBJ1-4	240.42		793836	A	⎯	⎯	⎯	⎯			B	TRBV16:CASSFRDWENTGQLYF:TRBJ2-2	CASSFRDWENTGQLYF	TRBV16	TRBJ2-2	2460.15
793705	A	TRAV12N-3,TRAV12-2,TRAV12D-1:CALRGDYSNNRLTL:TRAJ7	CALRGDYSNNRLTL	TRAV12N-3,TRAV12-2,TRAV12D-1	TRAJ7	929.715		B	TRBV13-1:CASSDALGVNQDTQYF:TRBJ2-5	CASSDALGVNQDTQYF	TRBV13-1	TRBJ2-5	715.396		793837	A	TRAV6-2:CVLGDLSSGSWQLIF:TRAJ22	CVLGDLSSGSWQLIF	TRAV6-2	TRAJ22	471.517		B	TRBV13-1:CASSVWGGGAETLYF:TRBJ2-3	CASSVWGGGAETLYF	TRBV13-1	TRBJ2-3	1556.97
793706	A	TRAV12N-3,TRAV12-2:CALRGDYSNNRLTL:TRAJ7	CALRGDYSNNRLTL	TRAV12N-3,TRAV12-2	TRAJ7	643.954		B	TRBV13-1:CASSDALGVNQDTQYF:TRBJ2-5	CASSDALGVNQDTQYF	TRBV13-1	TRBJ2-5	692.586		793838	A	TRAV8D-2,TRAV8N-2:CALATSSGQKLVF:TRAJ16	CALATSSGQKLVF	TRAV8D-2,TRAV8N-2	TRAJ16	1372.53		B	⎯	⎯	⎯	⎯
793707	A	⎯	⎯	⎯	⎯			B	TRBV12-2:CASSLARSNTEVFF:TRBJ1-1	CASSLARSNTEVFF	TRBV12-2	TRBJ1-1	372.618		793839	A	TRAV7-6:CAVSMDDYAQGLTF:TRAJ26	CAVSMDDYAQGLTF	TRAV7-6	TRAJ26	241.139		B	TRBV12-2:CASSLGLGQNTLYF:TRBJ2-4	CASSLGLGQNTLYF	TRBV12-2	TRBJ2-4	479.437
793708	A	⎯	⎯	⎯	⎯			B	TRBV5:CASSQEGGNTEVFF:TRBJ1-1	CASSQEGGNTEVFF	TRBV5	TRBJ1-1	256.284		793840	A	⎯	⎯	⎯	⎯			B	TRBV14:CASRDNYYAEQFF:TRBJ2-1	CASRDNYYAEQFF	TRBV14	TRBJ2-1	493.138
793709	A	TRAV7-3,TRAV7D-3:CAVPTSSGQKLVF:TRAJ16	CAVPTSSGQKLVF	TRAV7-3,TRAV7D-3	TRAJ16			B	⎯	⎯	⎯	⎯			793841	A	TRAV7-4:CAASEYQGGRALIF:TRAJ15	CAASEYQGGRALIF	TRAV7-4	TRAJ15	355.333		B	⎯	⎯	⎯	⎯
793710	A	TRAV21/DV12:CILRVESGANTGKLTF:TRAJ52	CILRVESGANTGKLTF	TRAV21/DV12	TRAJ52	614.141		B	TRBV15:CASSLGQGYEQYF:TRBJ2-7	CASSLGQGYEQYF	TRBV15	TRBJ2-7	914.944		793842	A	TRAV14-3,TRAV14D-1,TRAV14-2:CAASASSGSWQLIF:TRAJ22	CAASASSGSWQLIF	TRAV14-3,TRAV14D-1,TRAV14-2	TRAJ22	1762.1		B	TRBV15:CASSLGEGSDYTF:TRBJ1-2	CASSLGEGSDYTF	TRBV15	TRBJ1-2	2289.93
793711	A	TRAV7N-4:CAVRDYAQGLTF:TRAJ26	CAVRDYAQGLTF	TRAV7N-4	TRAJ26	1205.49		B	TRBV16:CASSLEGEQNTLYF:TRBJ2-4	CASSLEGEQNTLYF	TRBV16	TRBJ2-4	1383.7		793843	A	⎯	⎯	⎯	⎯			B	TRBV13-1:CASSGGQQDTQYF:TRBJ2-5	CASSGGQQDTQYF	TRBV13-1	TRBJ2-5	272.642
793712	A	TRAV12-1,TRAV12D-2:CALTADYSNNRLTL:TRAJ7	CALTADYSNNRLTL	TRAV12-1,TRAV12D-2	TRAJ7	508.68		B	TRBV5:CASSRQQGANSDYTF:TRBJ1-2	CASSRQQGANSDYTF	TRBV5	TRBJ1-2	867.416		793845	A	TRAV7-2:CAASLNYNQGKLIF:TRAJ23	CAASLNYNQGKLIF	TRAV7-2	TRAJ23	2675.52		B	TRBV16:CASRNWGGGQLYF:TRBJ2-2	CASRNWGGGQLYF	TRBV16	TRBJ2-2	580.146
793714	A	TRAV12D-2:CALSEGYGNEKITF:TRAJ48	CALSEGYGNEKITF	TRAV12D-2	TRAJ48	525.704		B	⎯	⎯	⎯	⎯			793846	A	⎯	⎯	⎯	⎯			B	TRBV15:CASSFTGGAREQYF:TRBJ2-7	CASSFTGGAREQYF	TRBV15	TRBJ2-7	3903.81
793714	A	TRAV4D-4,TRAV4D-3:CAAEMNYGSSGNKLIF:TRAJ32	CAAEMNYGSSGNKLIF	TRAV4D-4,TRAV4D-3	TRAJ32	465.911
793715	A	TRAV21/DV12:CILRVESGANTGKLTF:TRAJ52	CILRVESGANTGKLTF	TRAV21/DV12	TRAJ52	307.246		B	TRBV15:CASSLGQGYEQYF:TRBJ2-7	CASSLGQGYEQYF	TRBV15	TRBJ2-7	689.789		793847	A	⎯	⎯	⎯	⎯			B	TRBV13-1:CASSDAVGSNTEVFF:TRBJ1-1	CASSDAVGSNTEVFF	TRBV13-1	TRBJ1-1	1589.17
793717	A	TRAV12-2,TRAV12D-1,TRAV12N-3,TRAV12-3:CALRGDYSNNRLTL:TRAJ7	CALRGDYSNNRLTL	TRAV12-2,TRAV12D-1,TRAV12N-3,TRAV12-3	TRAJ7	387.566		B	TRBV13-1:CASSDALGVNQDTQYF:TRBJ2-5	CASSDALGVNQDTQYF	TRBV13-1	TRBJ2-5	840.842		793851	A	⎯	⎯	⎯	⎯			B	TRBV15:CASSWGGEDTQYF:TRBJ2-5	CASSWGGEDTQYF	TRBV15	TRBJ2-5	128.388
793718	A	TRAV21/DV12:CILRVESGANTGKLTF:TRAJ52	CILRVESGANTGKLTF	TRAV21/DV12	TRAJ52	170.463		B	TRBV15:CASSLGQGYEQYF:TRBJ2-7	CASSLGQGYEQYF	TRBV15	TRBJ2-7	1117.62		793853	A	⎯	⎯	⎯	⎯			B	TRBV4:CASSLSYEQYF:TRBJ2-7	CASSLSYEQYF	TRBV4	TRBJ2-7	3748.47
793721	A	⎯	⎯	⎯	⎯			B	TRBV15:CASSLGQGYEQYF:TRBJ2-7	CASSLGQGYEQYF	TRBV15	TRBJ2-7	567.63		793854	A	TRAV12D-2,TRAV12-1:CALRGTQVVGQLTF:TRAJ5	CALRGTQVVGQLTF	TRAV12D-2,TRAV12-1	TRAJ5	1537.24		B	TRBV5:CASSQDLGGRTDTQYF:TRBJ2-5	CASSQDLGGRTDTQYF	TRBV5	TRBJ2-5	30.7093
793722	A	TRAV21/DV12:CILRVESGANTGKLTF:TRAJ52	CILRVESGANTGKLTF	TRAV21/DV12	TRAJ52	1387.45		B	TRBV15:CASSLGQGYEQYF:TRBJ2-7	CASSLGQGYEQYF	TRBV15	TRBJ2-7	1469.89		793855	A	TRAV4D-4,TRAV4D-3:CAAGANYGNEKITF:TRAJ48	CAAGANYGNEKITF	TRAV4D-4,TRAV4D-3	TRAJ48	122.02		B	TRBV1:CTCSAGQGRDTGQLYF:TRBJ2-2	CTCSAGQGRDTGQLYF	TRBV1	TRBJ2-2	1293.55
793724	A	⎯	⎯	⎯	⎯			B	TRBV5:CASSLRDSNYAEQFF:TRBJ2-1	CASSLRDSNYAEQFF	TRBV5	TRBJ2-1	1186.18		793856	A	TRAV16:CAMREPAYSNTNKVVF:TRAJ34	CAMREPAYSNTNKVVF	TRAV16	TRAJ34	729.239		B	TRBV12-1:CASSPDWGGYEQYF:TRBJ2-7	CASSPDWGGYEQYF	TRBV12-1	TRBJ2-7	1194.67
793725	A	TRAV13D-2:CAIEGTGNYKYVF:TRAJ40	CAIEGTGNYKYVF	TRAV13D-2	TRAJ40	199.696		B	TRBV12-1:CASSPGTKYYAEQFF:TRBJ2-1	CASSPGTKYYAEQFF	TRBV12-1	TRBJ2-1	1125.32		793859	A	TRAV16:CAMREGDTNTGKLTF:TRAJ27	CAMREGDTNTGKLTF	TRAV16	TRAJ27	1873.99		B	TRBV13-1:CASSDGWGEISYEQYF:TRBJ2-7	CASSDGWGEISYEQYF	TRBV13-1	TRBJ2-7	883.865
793728	A	TRAV12D-2:CALSEGYGNEKITF:TRAJ48	CALSEGYGNEKITF	TRAV12D-2	TRAJ48	847.029		B	TRBV5:CASSQGLGGAETLYF:TRBJ2-3	CASSQGLGGAETLYF	TRBV5	TRBJ2-3	429.659		793860	A	⎯	⎯	⎯	⎯			B	TRBV12-1:CASSLETGSNERLFF:TRBJ1-4	CASSLETGSNERLFF	TRBV12-1	TRBJ1-4	684.399
793729	A	TRAV6-3:CAMRGPGGYKVVF:TRAJ12	CAMRGPGGYKVVF	TRAV6-3	TRAJ12	933.104		B	TRBV12-2:CASSLADRRVEQFF:TRBJ2-1	CASSLADRRVEQFF	TRBV12-2	TRBJ2-1	2502.25		793861	A	TRAV14-1,TRAV14-2:CAASASSGSWQLIF:TRAJ22	CAASASSGSWQLIF	TRAV14-1,TRAV14-2	TRAJ22	1356.3		B	TRBV13-2:CASGGLDSYEQYF:TRBJ2-7	CASGGLDSYEQYF	TRBV13-2	TRBJ2-7	459.93
793731	A	TRAV12N-3,TRAV12-3,TRAV12D-1:CALRGDYSNNRLTL:TRAJ7	CALRGDYSNNRLTL	TRAV12N-3,TRAV12-3,TRAV12D-1	TRAJ7	938.416		B	TRBV13-1:CASSDALGVNQDTQYF:TRBJ2-5	CASSDALGVNQDTQYF	TRBV13-1	TRBJ2-5	237.103		793862	A	TRAV3D-3,TRAV3-4:CAVSGGAGNKLTF:TRAJ17	CAVSGGAGNKLTF	TRAV3D-3,TRAV3-4	TRAJ17	355.036		B	⎯	⎯	⎯	⎯
793732	A	TRAV21/DV12:CILRVESGANTGKLTF:TRAJ52	CILRVESGANTGKLTF	TRAV21/DV12	TRAJ52	181.235		B	TRBV15:CASSLGQGYEQYF:TRBJ2-7	CASSLGQGYEQYF	TRBV15	TRBJ2-7	1623.54		793865	A	⎯	⎯	⎯	⎯			B	TRBV13-3:CASTTGNYAEQFF:TRBJ2-1	CASTTGNYAEQFF	TRBV13-3	TRBJ2-1	992.315
793733	A	TRAV12N-3,TRAV12-2,TRAV12-3:CALRGDYSNNRLTL:TRAJ7	CALRGDYSNNRLTL	TRAV12N-3,TRAV12-2,TRAV12-3	TRAJ7	700.659		B	TRBV13-1:CASSDALGVNQDTQYF:TRBJ2-5	CASSDALGVNQDTQYF	TRBV13-1	TRBJ2-5	2223.8		793866	A	TRAV12D-2,TRAV12D-1:CANSGGSNAKLTF:TRAJ42	CANSGGSNAKLTF	TRAV12D-2,TRAV12D-1	TRAJ42	396.617		B	TRBV13-3:CASSDDRANTEVFF:TRBJ1-1	CASSDDRANTEVFF	TRBV13-3	TRBJ1-1	446.162
793734	A	⎯	⎯	⎯	⎯			B	TRBV12-2:CASSLADRRVEQFF:TRBJ2-1	CASSLADRRVEQFF	TRBV12-2	TRBJ2-1	849.712		793867	A	TRAV12-3,TRAV12-2,TRAV12D-1,TRAV12-1,TRAV12N-3:CALSDRYNNNAPRF:TRAJ43	CALSDRYNNNAPRF	TRAV12-3,TRAV12-2,TRAV12D-1,TRAV12-1,TRAV12N-3	TRAJ43	565.019		B	TRBV15:CASSRDWGDQDTQYF:TRBJ2-5	CASSRDWGDQDTQYF	TRBV15	TRBJ2-5	2604.23
793735	A	⎯	⎯	⎯	⎯			B	TRBV13-1:CASSGGQGAEQYF:TRBJ2-7	CASSGGQGAEQYF	TRBV13-1	TRBJ2-7	276.878		793870	A	TRAV21/DV12:CILRENTGYQNFYF:TRAJ49	CILRENTGYQNFYF	TRAV21/DV12	TRAJ49	182.393		B	TRBV12-2:CASSLWGAAEVFF:TRBJ1-1	CASSLWGAAEVFF	TRBV12-2	TRBJ1-1	191.218
793737	A	⎯	⎯	⎯	⎯			B	TRBV15:CASSHYNSPLYF:TRBJ1-6	CASSHYNSPLYF	TRBV15	TRBJ1-6	1584.86		793871	A	⎯	⎯	⎯	⎯			B	TRBV5:CASSQDEDRGSYEQYF:TRBJ2-7	CASSQDEDRGSYEQYF	TRBV5	TRBJ2-7	2340.72
793739	A	TRAV12D-2:CALSPDYSNNRLTL:TRAJ7	CALSPDYSNNRLTL	TRAV12D-2	TRAJ7	812.173		B	TRBV12-2:CASSPGQGWYEQYF:TRBJ2-7	CASSPGQGWYEQYF	TRBV12-2	TRBJ2-7	1975.48		793873	A	⎯	⎯	⎯	⎯			B	TRBV14:CASSFPGVNQNTLYF:TRBJ2-4	CASSFPGVNQNTLYF	TRBV14	TRBJ2-4	377.227
793740	A	TRAV12D-2:CALSEGYGNEKITF:TRAJ48	CALSEGYGNEKITF	TRAV12D-2	TRAJ48	1447.23		B	⎯	⎯	⎯	⎯			793876	A	⎯	⎯	⎯	⎯			B	TRBV1:CTCSAELGENTGQLYF:TRBJ2-2	CTCSAELGENTGQLYF	TRBV1	TRBJ2-2	531.553
793742	A	TRAV21/DV12:CILRVESGANTGKLTF:TRAJ52	CILRVESGANTGKLTF	TRAV21/DV12	TRAJ52	166.739		B	TRBV15:CASSLGQGYEQYF:TRBJ2-7	CASSLGQGYEQYF	TRBV15	TRBJ2-7	1313.24		793877	A	TRAV16:CAMREAMDSNYQLIW:TRAJ33	CAMREAMDSNYQLIW	TRAV16	TRAJ33	1007.88		B	TRBV13-3:CASIGTVSNERLFF:TRBJ1-4	CASIGTVSNERLFF	TRBV13-3	TRBJ1-4	1753.73
793743	A	TRAV21/DV12:CILRVESGANTGKLTF:TRAJ52	CILRVESGANTGKLTF	TRAV21/DV12	TRAJ52	515.119		B	TRBV15:CASSLGQGYEQYF:TRBJ2-7	CASSLGQGYEQYF	TRBV15	TRBJ2-7	2590.61		793878	A	TRAV3-1,TRAV3-4,TRAV3D-3:CAVSETGTGSNRLTF:TRAJ28	CAVSETGTGSNRLTF	TRAV3-1,TRAV3-4,TRAV3D-3	TRAJ28	3507.84		B	⎯	⎯	⎯	⎯
793743	A	TRAV10N:CAASSPYGSSGNKLIF:TRAJ32	CAASSPYGSSGNKLIF	TRAV10N	TRAJ32	415.035
793744	A	⎯	⎯	⎯	⎯			B	TRBV12-1:CASSLQLGGSQNTLYF:TRBJ2-4	CASSLQLGGSQNTLYF	TRBV12-1	TRBJ2-4	643.641		793879	A	TRAV9-1,TRAV9D-3:CAVSGSWQLIF:TRAJ22	CAVSGSWQLIF	TRAV9-1,TRAV9D-3	TRAJ22	246.528		B	TRBV14:CASRDRVSNERLFF:TRBJ1-4	CASRDRVSNERLFF	TRBV14	TRBJ1-4	1137.78
793745	A	TRAV12D-2,TRAV12-3,TRAV12D-3:CALPMDSNYQLIW:TRAJ33	CALPMDSNYQLIW	TRAV12D-2,TRAV12-3,TRAV12D-3	TRAJ33	1475.35		B	TRBV19:CASSDRGQNTLYF:TRBJ2-4	CASSDRGQNTLYF	TRBV19	TRBJ2-4	1028.77		793883	A	TRAV13-2:CAIDSNTGKLTF:TRAJ27	CAIDSNTGKLTF	TRAV13-2	TRAJ27	692.429		B	TRBV12-1:CASSLLGGTLYF:TRBJ2-4	CASSLLGGTLYF	TRBV12-1	TRBJ2-4	1111.99
															793883	A	TRAV13-5:CVLSKDNNNAPRF:TRAJ43	CVLSKDNNNAPRF	TRAV13-5	TRAJ43			B	TRBV29:CARSNSGNTLYF:TRBJ1-3	CARSNSGNTLYF	TRBV29	TRBJ1-3	319.278
793746	A	TRAV12N-3,TRAV12D-1:CALRGDYSNNRLTL:TRAJ7	CALRGDYSNNRLTL	TRAV12N-3,TRAV12D-1	TRAJ7	326.944		B	TRBV13-1:CASSDALGVNQDTQYF:TRBJ2-5	CASSDALGVNQDTQYF	TRBV13-1	TRBJ2-5	791.566		793884	A	⎯	⎯	⎯	⎯			B	TRBV16:CASSLDTGGDQNTLYF:TRBJ2-4	CASSLDTGGDQNTLYF	TRBV16	TRBJ2-4	311.843
793747	A	TRAV12N-3,TRAV12-2,TRAV12D-1:CALRGDYSNNRLTL:TRAJ7	CALRGDYSNNRLTL	TRAV12N-3,TRAV12-2,TRAV12D-1	TRAJ7	420.486		B	TRBV13-1:CASSDALGVNQDTQYF:TRBJ2-5	CASSDALGVNQDTQYF	TRBV13-1	TRBJ2-5	446.603		793885	A	TRAV3D-3,TRAV3-1:CAVSRGGSALGRLHF:TRAJ18	CAVSRGGSALGRLHF	TRAV3D-3,TRAV3-1	TRAJ18	1463.5		B	TRBV29:CASSPTGASNTGQLYF:TRBJ2-2	CASSPTGASNTGQLYF	TRBV29	TRBJ2-2	237.801
793748	A	⎯	⎯	⎯	⎯			B	TRBV5:CASSQGLGGAETLYF:TRBJ2-3	CASSQGLGGAETLYF	TRBV5	TRBJ2-3	559.794		793886	A	TRAV9N-2:CVLSSGNYNQGKLIF:TRAJ23	CVLSSGNYNQGKLIF	TRAV9N-2	TRAJ23	145.774		B	TRBV13-3:CASSGRDNNERLFF:TRBJ1-4	CASSGRDNNERLFF	TRBV13-3	TRBJ1-4	424.02
															793886								B	TRBV5:CASSPGTVYNSPLYF:TRBJ1-6	CASSPGTVYNSPLYF	TRBV5	TRBJ1-6	582.147
793753	A	TRAV12D-2:CALTADYSNNRLTL:TRAJ7	CALTADYSNNRLTL	TRAV12D-2	TRAJ7	2748.14		B	TRBV5:CASSRQQGANSDYTF:TRBJ1-2	CASSRQQGANSDYTF	TRBV5	TRBJ1-2	1098.11		793887	A	TRAV13-4/DV7,TRAV13N-1:CAISSGSWQLIF:TRAJ22	CAISSGSWQLIF	TRAV13-4/DV7,TRAV13N-1	TRAJ22	1186.59		B	TRBV19:CASSFPGLANTEVFF:TRBJ1-1	CASSFPGLANTEVFF	TRBV19	TRBJ1-1	2068.59
793755	A	TRAV12N-3,TRAV12-2,TRAV12-3,TRAV12D-1:CALRGDYSNNRLTL:TRAJ7	CALRGDYSNNRLTL	TRAV12N-3,TRAV12-2,TRAV12-3,TRAV12D-1	TRAJ7	653.585		B	TRBV13-1:CASSDALGVNQDTQYF:TRBJ2-5	CASSDALGVNQDTQYF	TRBV13-1	TRBJ2-5	895.919		793888	A	TRAV13D-1:CALELGDNSKLIW:TRAJ38	CALELGDNSKLIW	TRAV13D-1	TRAJ38	3725.54		B	TRBV19:CASSQTGRDTQYF:TRBJ2-5	CASSQTGRDTQYF	TRBV19	TRBJ2-5	1614.87
793756	A	TRAV9N-2:CVLSAGPGNTGKLIF:TRAJ37	CVLSAGPGNTGKLIF	TRAV9N-2	TRAJ37	120.282		B	TRBV26:CASSPRTGWNSPLYF:TRBJ1-6	CASSPRTGWNSPLYF	TRBV26	TRBJ1-6	1285.21		793889	A	TRAV14-2,TRAV14D-1:CAASGSGGSNAKLTF:TRAJ42	CAASGSGGSNAKLTF	TRAV14-2,TRAV14D-1	TRAJ42	208.375		B	TRBV13-2:CASGDAAGNTLYF:TRBJ1-3	CASGDAAGNTLYF	TRBV13-2	TRBJ1-3	2215.03
793757	A	TRAV5-1:CSAYNTGNYKYVF:TRAJ40	CSAYNTGNYKYVF	TRAV5-1	TRAJ40	632.466		B	⎯	⎯	⎯	⎯			793890	A	TRAV12-1,TRAV12D-1,TRAV12N-3:CALSDSNTNTGKLTF:TRAJ27	CALSDSNTNTGKLTF	TRAV12-1,TRAV12D-1,TRAV12N-3	TRAJ27	508.018		B	TRBV13-3:CASSGLGASQNTLYF:TRBJ2-4	CASSGLGASQNTLYF	TRBV13-3	TRBJ2-4	889.089
793760	A	TRAV16:CAMREGSTGGNNKLTF:TRAJ56	CAMREGSTGGNNKLTF	TRAV16	TRAJ56	103.897		B	TRBV17:CASSSRGLYEQYF:TRBJ2-7	CASSSRGLYEQYF	TRBV17	TRBJ2-7	1597.34		793891	A	TRAV12-3,TRAV12-1,TRAV12D-1:CALSDRYSNNRIFF:TRAJ31	CALSDRYSNNRIFF	TRAV12-3,TRAV12-1,TRAV12D-1	TRAJ31	552.149		B	TRBV26:CASSLQVNTEVFF:TRBJ1-1	CASSLQVNTEVFF	TRBV26	TRBJ1-1	1686.95
793761	A	⎯	⎯	⎯	⎯			B	TRBV2:CASSQGGGISNERLFF:TRBJ1-4	CASSQGGGISNERLFF	TRBV2	TRBJ1-4	385.965		793894	A	TRAV21/DV12:CILRVAGAEGADRLTF:TRAJ45	CILRVAGAEGADRLTF	TRAV21/DV12	TRAJ45	1101		B	TRBV4:CASSDWGRTGQLYF:TRBJ2-2	CASSDWGRTGQLYF	TRBV4	TRBJ2-2	686.653
793762	A	TRAV7-2:CAATDYSNNRLTL:TRAJ7	CAATDYSNNRLTL	TRAV7-2	TRAJ7	246.51		B	⎯	⎯	⎯	⎯			793898	A	TRAV6D-6,TRAV6-7/DV9,TRAV6D-5,TRAV6D-7:CALGETEGADRLTF:TRAJ45	CALGETEGADRLTF	TRAV6D-6,TRAV6-7/DV9,TRAV6D-5,TRAV6D-7	TRAJ45	1377.81		B	⎯	⎯	⎯	⎯
793763	A	⎯	⎯	⎯	⎯			B	TRBV12-2:CASSLADRRVEQFF:TRBJ2-1	CASSLADRRVEQFF	TRBV12-2	TRBJ2-1	430.632		793899	A	TRAV13D-2:CAIEPNTGANTGKLTF:TRAJ52	CAIEPNTGANTGKLTF	TRAV13D-2	TRAJ52	1247.34		B	TRBV3:CASSPGTGGNYAEQFF:TRBJ2-1	CASSPGTGGNYAEQFF	TRBV3	TRBJ2-1	215.642
793765	A	TRAV21/DV12:CILRVESGANTGKLTF:TRAJ52	CILRVESGANTGKLTF	TRAV21/DV12	TRAJ52	1657.11		B	TRBV15:CASSLGQGYEQYF:TRBJ2-7	CASSLGQGYEQYF	TRBV15	TRBJ2-7	1382.16		793900	A	TRAV9D-3:CALSPDKGSALGRLHF:TRAJ18	CALSPDKGSALGRLHF	TRAV9D-3	TRAJ18	1474.55		B	TRBV29:CASSLRLNNQAPLF:TRBJ1-5	CASSLRLNNQAPLF	TRBV29	TRBJ1-5	2205.79
793765	A	TRAV10D,TRAV10N:CAASSPYGSSGNKLIF:TRAJ32	CAASSPYGSSGNKLIF	TRAV10D,TRAV10N	TRAJ32	474.643
793766	A	TRAV14-2,TRAV14-1:CAASEMTGGYKVVF:TRAJ12	CAASEMTGGYKVVF	TRAV14-2,TRAV14-1	TRAJ12	1770.72		B	TRBV13-2:CASGDTGGTGQLYF:TRBJ2-2	CASGDTGGTGQLYF	TRBV13-2	TRBJ2-2	685.711		793901	A	⎯	⎯	⎯	⎯			B	TRBV5:CASSQDQGYEQYF:TRBJ2-7	CASSQDQGYEQYF	TRBV5	TRBJ2-7	1066.04
793768	A	TRAV9D-3,TRAV9N-2:CVLRGNYAQGLTF:TRAJ26	CVLRGNYAQGLTF	TRAV9D-3,TRAV9N-2	TRAJ26			B	TRBV13-1:CASSDPRDNQDTQYF:TRBJ2-5	CASSDPRDNQDTQYF	TRBV13-1	TRBJ2-5	2117.23		793903	A	⎯	⎯	⎯	⎯			B	TRBV5:CASSQGRVAEQFF:TRBJ2-1	CASSQGRVAEQFF	TRBV5	TRBJ2-1	2388.22
793769	A	⎯	⎯	⎯	⎯			B	TRBV5:CASSQVGTGAAEQFF:TRBJ2-1	CASSQVGTGAAEQFF	TRBV5	TRBJ2-1	172.246		793905	A	⎯	⎯	⎯	⎯			B	TRBV19:CASRSGTGGNERLFF:TRBJ1-4	CASRSGTGGNERLFF	TRBV19	TRBJ1-4	1895.62
793770	A	TRAV12N-3,TRAV12-2,TRAV12D-1:CALRGDYSNNRLTL:TRAJ7	CALRGDYSNNRLTL	TRAV12N-3,TRAV12-2,TRAV12D-1	TRAJ7	1316.55		B	TRBV13-1:CASSDALGVNQDTQYF:TRBJ2-5	CASSDALGVNQDTQYF	TRBV13-1	TRBJ2-5	752.361		793906	A	TRAV6D-7,TRAV6-5,TRAV6-7/DV9:CALSSNTGANTGKLTF:TRAJ52	CALSSNTGANTGKLTF	TRAV6D-7,TRAV6-5,TRAV6-7/DV9	TRAJ52	611.743		B	TRBV12-1:CASSLQISNERLFF:TRBJ1-4	CASSLQISNERLFF	TRBV12-1	TRBJ1-4	902.192
793771	A	⎯	⎯	⎯	⎯			B	TRBV31:CAWSRRGFNQDTQYF:TRBJ2-5	CAWSRRGFNQDTQYF	TRBV31	TRBJ2-5	276.147		793907	A	⎯	⎯	⎯	⎯			B	TRBV29:CASSPGSSAETLYF:TRBJ2-3	CASSPGSSAETLYF	TRBV29	TRBJ2-3	1044.79
793773	A	TRAV12D-2:CALSEGYGNEKITF:TRAJ48	CALSEGYGNEKITF	TRAV12D-2	TRAJ48	431.238		B	TRBV5:CASSQGLGGAETLYF:TRBJ2-3	CASSQGLGGAETLYF	TRBV5	TRBJ2-3	347.376		793908	A	TRAV12N-3,TRAV12-2,TRAV12D-1:CALSDRQGGRALIF:TRAJ15	CALSDRQGGRALIF	TRAV12N-3,TRAV12-2,TRAV12D-1	TRAJ15	155.503		B	TRBV19:CASNRDRGDGNTLYF:TRBJ1-3	CASNRDRGDGNTLYF	TRBV19	TRBJ1-3	1175.49
793774	A	⎯	⎯	⎯	⎯			B	TRBV20:CGASRGGSSYEQYF:TRBJ2-7	CGASRGGSSYEQYF	TRBV20	TRBJ2-7	477.868		793910	A	⎯	⎯	⎯	⎯			B	TRBV13-3:CASSPDRGNSDYTF:TRBJ1-2	CASSPDRGNSDYTF	TRBV13-3	TRBJ1-2	3095.68
793776	A	⎯	⎯	⎯	⎯			B	TRBV20:CGAPGTGENTLYF:TRBJ2-4	CGAPGTGENTLYF	TRBV20	TRBJ2-4	351.271		793911	A	TRAV7D-3,TRAV7-3:CAVEGTGGYKVVF:TRAJ12	CAVEGTGGYKVVF	TRAV7D-3,TRAV7-3	TRAJ12	1637.47		B	TRBV3:CASSSGQVNERLFF:TRBJ1-4	CASSSGQVNERLFF	TRBV3	TRBJ1-4	335.365
793776								B	TRBV31:CAWSRDRGRNSDYTF:TRBJ1-2	CAWSRDRGRNSDYTF	TRBV31	TRBJ1-2	567.078
793777	A	⎯	⎯	⎯	⎯			B	TRBV1:CTCSAYRGANTEVFF:TRBJ1-1	CTCSAYRGANTEVFF	TRBV1	TRBJ1-1	778.045		793914	A	TRAV13N-1,TRAV13-1,TRAV13D-3:CAMNTNTGKLTF:TRAJ27	CAMNTNTGKLTF	TRAV13N-1,TRAV13-1,TRAV13D-3	TRAJ27	1151.64		B	⎯	⎯	⎯	⎯
793778	A	⎯	⎯	⎯	⎯			B	TRBV13-3:CASSDLGSAETLYF:TRBJ2-3	CASSDLGSAETLYF	TRBV13-3	TRBJ2-3	1645.13		793915	A	⎯	⎯	⎯	⎯			B	TRBV19:CASSGLGYEQYF:TRBJ2-7	CASSGLGYEQYF	TRBV19	TRBJ2-7	1292.53
793781	A	⎯	⎯	⎯	⎯			B	TRBV12-1:CASSRDFYEQYF:TRBJ2-7	CASSRDFYEQYF	TRBV12-1	TRBJ2-7	1359.49		793918	A	⎯	⎯	⎯	⎯			B	TRBV17:CASSREPGQDTQYF:TRBJ2-5	CASSREPGQDTQYF	TRBV17	TRBJ2-5	180.895
793782	A	TRAV7-4:CAASEDYGSSGNKLIF:TRAJ32	CAASEDYGSSGNKLIF	TRAV7-4	TRAJ32	342.787		B	TRBV12-1:CASSYRENTEVFF:TRBJ1-1	CASSYRENTEVFF	TRBV12-1	TRBJ1-1	308.868		793919	A	TRAV6D-7,TRAV6-5,TRAV6-7/DV9:CALSPGIYAQGLTF:TRAJ26	CALSPGIYAQGLTF	TRAV6D-7,TRAV6-5,TRAV6-7/DV9	TRAJ26	1148.51		B	TRBV12-2:CASSRDTQYF:TRBJ2-5	CASSRDTQYF	TRBV12-2	TRBJ2-5	2790.21
793783	A	TRAV6-5,TRAV6D-6,TRAV6D-7:CALSDPYGSSGNKLIF:TRAJ32	CALSDPYGSSGNKLIF	TRAV6-5,TRAV6D-6,TRAV6D-7	TRAJ32	518.131		B	TRBV12-2:CASSPRQDNSPLYF:TRBJ1-6	CASSPRQDNSPLYF	TRBV12-2	TRBJ1-6	2730.62		793921	A	TRAV12-1:CALSDGAKLTF:TRAJ39	CALSDGAKLTF	TRAV12-1	TRAJ39	3177.59		B	TRBV13-2:CASGDAWGASAETLYF:TRBJ2-3	CASGDAWGASAETLYF	TRBV13-2	TRBJ2-3	2638.67
793784	A	TRAV12N-3,TRAV12-2:CALRGDYSNNRLTL:TRAJ7	CALRGDYSNNRLTL	TRAV12N-3,TRAV12-2	TRAJ7	74.679		B	TRBV13-1:CASSDALGVNQDTQYF:TRBJ2-5	CASSDALGVNQDTQYF	TRBV13-1	TRBJ2-5	438.002		793922	A	⎯	⎯	⎯	⎯			B	TRBV14:CASSFPGVEYF:TRBJ2-7	CASSFPGVEYF	TRBV14	TRBJ2-7	1896.55
793786	A	TRAV7-2,TRAV7-3,TRAV7D-3:CAAGDSGTYQRF:TRAJ13	CAAGDSGTYQRF	TRAV7-2,TRAV7-3,TRAV7D-3	TRAJ13			B	⎯	⎯	⎯	⎯			793924	A	⎯	⎯	⎯	⎯			B	TRBV20:CGASSSQNTLYF:TRBJ2-4	CGASSSQNTLYF	TRBV20	TRBJ2-4	996.222
793787	A	TRAV12-1,TRAV12-3:CALRADYSNNRLTL:TRAJ7	CALRADYSNNRLTL	TRAV12-1,TRAV12-3	TRAJ7	111.076		B	TRBV16:CASSSRGRFEQYF:TRBJ2-7	CASSSRGRFEQYF	TRBV16	TRBJ2-7	531.13		793926	A	TRAV12-1,TRAV12D-1:CALSEEGGRALIF:TRAJ15	CALSEEGGRALIF	TRAV12-1,TRAV12D-1	TRAJ15	815.095		B	⎯	⎯	⎯	⎯
793788	A	TRAV16:CAMREGTGYQNFYF:TRAJ49	CAMREGTGYQNFYF	TRAV16	TRAJ49	918.654		B	⎯	⎯	⎯	⎯			793930	A	TRAV12N-3,TRAV12D-1:CALSDRPMNYNQGKLIF:TRAJ23	CALSDRPMNYNQGKLIF	TRAV12N-3,TRAV12D-1	TRAJ23	4006.02		B	TRBV13-1:CASSDVQNTLYF:TRBJ2-4	CASSDVQNTLYF	TRBV13-1	TRBJ2-4	550.984
793789	A	TRAV14-2,TRAV14-1:CAANNYSNNRLTL:TRAJ7	CAANNYSNNRLTL	TRAV14-2,TRAV14-1	TRAJ7	518.761		B	TRBV12-2:CASSDWGGDYAEQFF:TRBJ2-1	CASSDWGGDYAEQFF	TRBV12-2	TRBJ2-1	942.519		793931	A	TRAV16:CAMREGDSGGSNYKLTF:TRAJ53	CAMREGDSGGSNYKLTF	TRAV16	TRAJ53	111.282		B	TRBV13-2:CASGGGTDNNQAPLF:TRBJ1-5	CASGGGTDNNQAPLF	TRBV13-2	TRBJ1-5	914.702
793789	A	TRAV16N,TRAV16:CAMREGNSAGNKLTF:TRAJ17	CAMREGNSAGNKLTF	TRAV16N,TRAV16	TRAJ17	790.598
793790	A	TRAV12D-2,TRAV12-3,TRAV12D-3:CALPMDSNYQLIW:TRAJ33	CALPMDSNYQLIW	TRAV12D-2,TRAV12-3,TRAV12D-3	TRAJ33	1289.1		B	TRBV19:CASSDRGQNTLYF:TRBJ2-4	CASSDRGQNTLYF	TRBV19	TRBJ2-4	3822.61		793932	A	TRAV4N-3,TRAV4D-3:CAAASSGSWQLIF:TRAJ22	CAAASSGSWQLIF	TRAV4N-3,TRAV4D-3	TRAJ22	961.147		B	TRBV12-2:CASSLTGRGTEVFF:TRBJ1-1	CASSLTGRGTEVFF	TRBV12-2	TRBJ1-1	2986.24
793792	A	TRAV4D-4,TRAV4D-3:CAAEMNYGSSGNKLIF:TRAJ32	CAAEMNYGSSGNKLIF	TRAV4D-4,TRAV4D-3	TRAJ32	551.411		B	TRBV5:CASSQGLGGAETLYF:TRBJ2-3	CASSQGLGGAETLYF	TRBV5	TRBJ2-3	1195.9		793933	A	TRAV5D-4:CAAITGSGGKLTL:TRAJ44	CAAITGSGGKLTL	TRAV5D-4	TRAJ44	411.85		B	TRBV5:CASSQGTGGAEQFF:TRBJ2-1	CASSQGTGGAEQFF	TRBV5	TRBJ2-1	1304.05
793792	A	TRAV12D-2:CALSEGYGNEKITF:TRAJ48	CALSEGYGNEKITF	TRAV12D-2	TRAJ48	984.159									793933	A	TRAV4D-4,TRAV4N-3:CAADNAGAKLTF:TRAJ39	CAADNAGAKLTF	TRAV4D-4,TRAV4N-3	TRAJ39	1045.7
793793	A	⎯	⎯	⎯	⎯			B	TRBV29:CASSPGISNERLFF:TRBJ1-4	CASSPGISNERLFF	TRBV29	TRBJ1-4	1270.56		793935	A	TRAV6D-7:CALGAYTGANTGKLTF:TRAJ52	CALGAYTGANTGKLTF	TRAV6D-7	TRAJ52			B	TRBV13-3:CASSEGIYEQYF:TRBJ2-7	CASSEGIYEQYF	TRBV13-3	TRBJ2-7
793794	A	TRAV21/DV12:CILRVESGANTGKLTF:TRAJ52	CILRVESGANTGKLTF	TRAV21/DV12	TRAJ52	1002.76		B	TRBV15:CASSLGQGYEQYF:TRBJ2-7	CASSLGQGYEQYF	TRBV15	TRBJ2-7	1132.7		793936	A	TRAV7-2,TRAV7-3,TRAV7D-3:CARGGSSGNKLIF:TRAJ32	CARGGSSGNKLIF	TRAV7-2,TRAV7-3,TRAV7D-3	TRAJ32	161.799		B	TRBV1:CTCSADRREQYF:TRBJ2-7	CTCSADRREQYF	TRBV1	TRBJ2-7	2226.12
793795	A	TRAV7-4:CAASEDYGSSGNKLIF:TRAJ32	CAASEDYGSSGNKLIF	TRAV7-4	TRAJ32	1379.3		B	⎯	⎯	⎯	⎯			793937	A	⎯	⎯	⎯	⎯			B	TRBV13-2:CASGDGTGREQYF:TRBJ2-7	CASGDGTGREQYF	TRBV13-2	TRBJ2-7	1977.72
793796	A	TRAV21/DV12:CILRVESGANTGKLTF:TRAJ52	CILRVESGANTGKLTF	TRAV21/DV12	TRAJ52	1080.32		B	TRBV15:CASSLGQGYEQYF:TRBJ2-7	CASSLGQGYEQYF	TRBV15	TRBJ2-7	508.888		793941	A	TRAV8D-2,TRAV8N-2:CAPMSNYNVLYF:TRAJ21	CAPMSNYNVLYF	TRAV8D-2,TRAV8N-2	TRAJ21	192.355		B	TRBV5:CASSLGLGGYAETLYF:TRBJ2-3	CASSLGLGGYAETLYF	TRBV5	TRBJ2-3	502.938
793796	A	TRAV10N:CAASSPYGSSGNKLIF:TRAJ32	CAASSPYGSSGNKLIF	TRAV10N	TRAJ32	778.655
793797	A	TRAV21/DV12:CILRVESGANTGKLTF:TRAJ52	CILRVESGANTGKLTF	TRAV21/DV12	TRAJ52	231.246		B	TRBV15:CASSLGQGYEQYF:TRBJ2-7	CASSLGQGYEQYF	TRBV15	TRBJ2-7	655.585		793942	A	TRAV16:CAMREGRRGTGYQNFYF:TRAJ49	CAMREGRRGTGYQNFYF	TRAV16	TRAJ49	13.1808		B	TRBV15:CASPPRRTGDNQAPLF:TRBJ1-5	CASPPRRTGDNQAPLF	TRBV15	TRBJ1-5	3044.15
793797	A	TRAV10N:CAASSPYGSSGNKLIF:TRAJ32	CAASSPYGSSGNKLIF	TRAV10N	TRAJ32	64.5374
793798	A	⎯	⎯	⎯	⎯			B	TRBV13-2:CASGDAGGANSDYTF:TRBJ1-2	CASGDAGGANSDYTF	TRBV13-2	TRBJ1-2	509.182		793943	A	⎯	⎯	⎯	⎯			B	TRBV13-3:CASSEAGVQDTQYF:TRBJ2-5	CASSEAGVQDTQYF	TRBV13-3	TRBJ2-5	2218.98
793799	A	TRAV12N-3,TRAV12D-1:CALRGDYSNNRLTL:TRAJ7	CALRGDYSNNRLTL	TRAV12N-3,TRAV12D-1	TRAJ7	217.282		B	TRBV13-1:CASSDALGVNQDTQYF:TRBJ2-5	CASSDALGVNQDTQYF	TRBV13-1	TRBJ2-5	601.566		793944	A	TRAV12D-1,TRAV12N-3:CALSDMNYNQGKLIF:TRAJ23	CALSDMNYNQGKLIF	TRAV12D-1,TRAV12N-3	TRAJ23	43.9708		B	TRBV12-1:CASSRPGQGFSNERLFF:TRBJ1-4	CASSRPGQGFSNERLFF	TRBV12-1	TRBJ1-4	804.822
793800	A	TRAV14-3:CAASRAGSGGKLTL:TRAJ44	CAASRAGSGGKLTL	TRAV14-3	TRAJ44	593.448		B	TRBV12-1:CASSRHINSGNTLYF:TRBJ1-3	CASSRHINSGNTLYF	TRBV12-1	TRBJ1-3	1075.83		793945	A	⎯	⎯	⎯	⎯			B	TRBV16:CASSDRGSAETLYF:TRBJ2-3	CASSDRGSAETLYF	TRBV16	TRBJ2-3	3493.07
793803	A	TRAV12D-2,TRAV12-3,TRAV12D-3:CALSDSSSFSKLVF:TRAJ50	CALSDSSSFSKLVF	TRAV12D-2,TRAV12-3,TRAV12D-3	TRAJ50	937.865		B	TRBV13-1:CASSDAGGNNQAPLF:TRBJ1-5	CASSDAGGNNQAPLF	TRBV13-1	TRBJ1-5	739.88		793946	A	⎯	⎯	⎯	⎯			B	TRBV16:CASSPEQNYAEQFF:TRBJ2-1	CASSPEQNYAEQFF	TRBV16	TRBJ2-1	328.133
793804	A	TRAV6-2:CVLGDGGSNAKLTF:TRAJ42	CVLGDGGSNAKLTF	TRAV6-2	TRAJ42	197.829		B	TRBV2:CASSQGGGISNERLFF:TRBJ1-4	CASSQGGGISNERLFF	TRBV2	TRBJ1-4	908.064		793947	A	TRAV15N-1,TRAV15-1/DV6-1:CALWELVPNTNKVVF:TRAJ34	CALWELVPNTNKVVF	TRAV15N-1,TRAV15-1/DV6-1	TRAJ34	1759.53		B	⎯	⎯	⎯	⎯
793805	A	TRAV12D-1:CALSDRYNQGKLIF:TRAJ23	CALSDRYNQGKLIF	TRAV12D-1	TRAJ23			B	TRBV2:CASSPTGSSQNTLYF:TRBJ2-4	CASSPTGSSQNTLYF	TRBV2	TRBJ2-4	295.376		793949	A	TRAV8-1,TRAV8D-1:CATDASGGYKVVF:TRAJ12	CATDASGGYKVVF	TRAV8-1,TRAV8D-1	TRAJ12	1004.71		B	TRBV4:CASSSRKGAETLYF:TRBJ2-3	CASSSRKGAETLYF	TRBV4	TRBJ2-3	261.159
793806	A	⎯	⎯	⎯	⎯			B	TRBV3:CASSPDWGNQDTQYF:TRBJ2-5	CASSPDWGNQDTQYF	TRBV3	TRBJ2-5	2089.71		793952	A	⎯	⎯	⎯	⎯			B	TRBV13-2:CASGDRAGNTLYF:TRBJ1-3	CASGDRAGNTLYF	TRBV13-2	TRBJ1-3	152.382
793807	A	TRAV6-2:CVLGDGGSNAKLTF:TRAJ42	CVLGDGGSNAKLTF	TRAV6-2	TRAJ42	181.635		B	TRBV2:CASSQGGGISNERLFF:TRBJ1-4	CASSQGGGISNERLFF	TRBV2	TRBJ1-4	252.312		793953	A	TRAV6D-7,TRAV6D-5:CALGGTNSAGNKLTF:TRAJ17	CALGGTNSAGNKLTF	TRAV6D-7,TRAV6D-5	TRAJ17	574.38		B	TRBV29:CASSPGQSNYAEQFF:TRBJ2-1	CASSPGQSNYAEQFF	TRBV29	TRBJ2-1	378.741
793808	A	TRAV14-3:CAASATATGGNNKLTF:TRAJ56	CAASATATGGNNKLTF	TRAV14-3	TRAJ56	818.065		B	TRBV1:CTCSAYRGANTEVFF:TRBJ1-1	CTCSAYRGANTEVFF	TRBV1	TRBJ1-1	4028.34		793954	A	TRAV6-5:CALSNNNAPRF:TRAJ43	CALSNNNAPRF	TRAV6-5	TRAJ43	489.882		B	⎯	⎯	⎯	⎯
793809	A	⎯	⎯	⎯	⎯			B	TRBV29:CASSLGQGTGQLYF:TRBJ2-2	CASSLGQGTGQLYF	TRBV29	TRBJ2-2	300.678		793955	A	⎯	⎯	⎯	⎯			B	TRBV13-2:CASGDAGGNSDYTF:TRBJ1-2	CASGDAGGNSDYTF	TRBV13-2	TRBJ1-2	3166.03
793810	A	⎯	⎯	⎯	⎯			B	TRBV5:CASSRTGGISNERLFF:TRBJ1-4	CASSRTGGISNERLFF	TRBV5	TRBJ1-4	2890.91		793958	A	TRAV16N,TRAV16:CAMREGSTNAYKVIF:TRAJ30	CAMREGSTNAYKVIF	TRAV16N,TRAV16	TRAJ30	1641.27		B	TRBV17:CASSRVGQNTEVFF:TRBJ1-1	CASSRVGQNTEVFF	TRBV17	TRBJ1-1	4247.94
															793958	A	TRAV12N-3,TRAV12D-1:CALGNSNNRIFF:TRAJ31	CALGNSNNRIFF	TRAV12N-3,TRAV12D-1	TRAJ31	1460.98
793812	A	⎯	⎯	⎯	⎯			B	TRBV13-1:CASSDGQGQNTLYF:TRBJ2-4	CASSDGQGQNTLYF	TRBV13-1	TRBJ2-4	866.397		793959	A	TRAV7-3,TRAV7D-3:CAVVPGTGSNRLTF:TRAJ28	CAVVPGTGSNRLTF	TRAV7-3,TRAV7D-3	TRAJ28	462.704		B	TRBV12-2:CASSPDRGETLYF:TRBJ2-3	CASSPDRGETLYF	TRBV12-2	TRBJ2-3	815.993
793813	A	TRAV6-2:CVLGDGGSNAKLTF:TRAJ42	CVLGDGGSNAKLTF	TRAV6-2	TRAJ42			B	⎯	⎯	⎯	⎯			793960	A	TRAV9-1,TRAV9-3,TRAV9-4,TRAV9D-2,TRAV9D-3:CAVRANTGYQNFYF:TRAJ49	CAVRANTGYQNFYF	TRAV9-1,TRAV9-3,TRAV9-4,TRAV9D-2,TRAV9D-3	TRAJ49	222.063		B	TRBV17:CASSRLDWGGLYEQYF:TRBJ2-7	CASSRLDWGGLYEQYF	TRBV17	TRBJ2-7	986.356
793814	A	TRAV12D-1:CALVTGNTGKLIF:TRAJ37	CALVTGNTGKLIF	TRAV12D-1	TRAJ37	801.193		B	TRBV5:CASSQVGTGDYEQYF:TRBJ2-7	CASSQVGTGDYEQYF	TRBV5	TRBJ2-7	2866.8		793961	A	TRAV19:CAAGHIASSSFSKLVF:TRAJ50	CAAGHIASSSFSKLVF	TRAV19	TRAJ50	3048.96		B	TRBV15:CASSLLGGLAEQFF:TRBJ2-1	CASSLLGGLAEQFF	TRBV15	TRBJ2-1	1253.42
Note: 1. cells 793830, 793833, 793852, 793868, 793875, 793881, 793892, 793902, 793913, 793916, 793917, 793940, 793956, 793957 have no TCR call
2. expresion level (TPM) is based on TraCer output, if available
